# Supplementary material
Source: Royal Society of Chemistry journal article supplement (doi:10.1039/d6se00071a)
Supplement: d6se00071a1.pdf [file d6se00071a1.pdf]

## Supporting Information

### Facet-Defect Coupling in CuO Catalysts Boosts Ammonia Oxidation Kinetics

Mengyuan Zhao<sup>1</sup>, Shaohan Liang<sup>2</sup>, Junhui Liang<sup>1,\*</sup>, Jiahui Hou<sup>1</sup>, Jiangchao Lou<sup>1</sup>, Xin Yao<sup>3</sup>, Huayu Chen<sup>1</sup>, Feng Zhou<sup>4,\*</sup>, Huaizhou Jin<sup>5</sup>, Da Chen<sup>1,\*</sup>

<sup>1</sup> College of Materials and Chemistry, China Jiliang University, Hangzhou 300018, Zhejiang, China

<sup>2</sup> College of metrology measurement and instrument, China Jiliang University, Hangzhou 300018, Zhejiang, China

<sup>3</sup> College of Optical and Electronic Technology, China Jiliang University, Hangzhou 300018, Zhejiang, China

<sup>4</sup> National Institute of Metrology, Beijing 102200, China

<sup>5</sup> Key Laboratory of Quantum Precision Measurement, College of Physics, Zhejiang University of Technology, Hangzhou, 300018, Zhejiang, China

\*Corresponding Author

*E-mail:* [nkljhyx@163.com](mailto:nkljhyx@163.com); [zhoufeng@nim.ac.cn](mailto:zhoufeng@nim.ac.cn); [dchen\\_80@hotmail.com](mailto:dchen_80@hotmail.com)

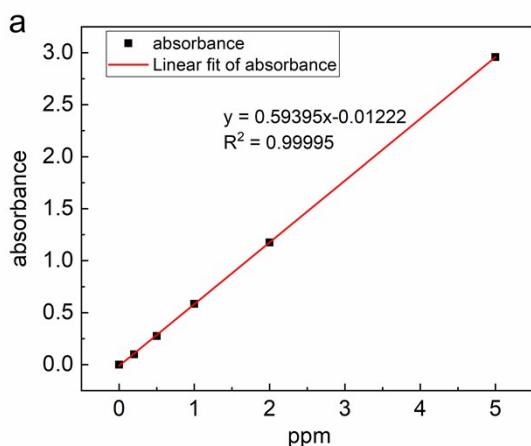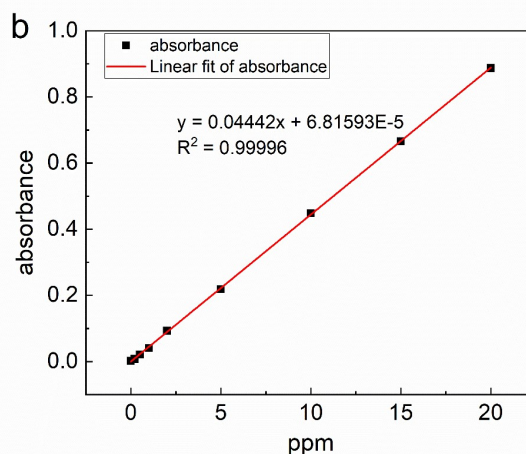

Figure S1. Standard calibration curves for the quantitative analysis of AOR products. (a) Calibration curve for  $\text{NO}_2^-$  determination using the Griess reagent method, showing absorbance at 540 nm as a function of  $\text{NO}_2^-$  concentration. (b) Calibration curve for  $\text{NO}_3^-$  determination using the dual-wavelength direct absorbance method (220 and 275 nm), with corrected UV absorbance plotted against  $\text{NO}_3^-$  concentration.

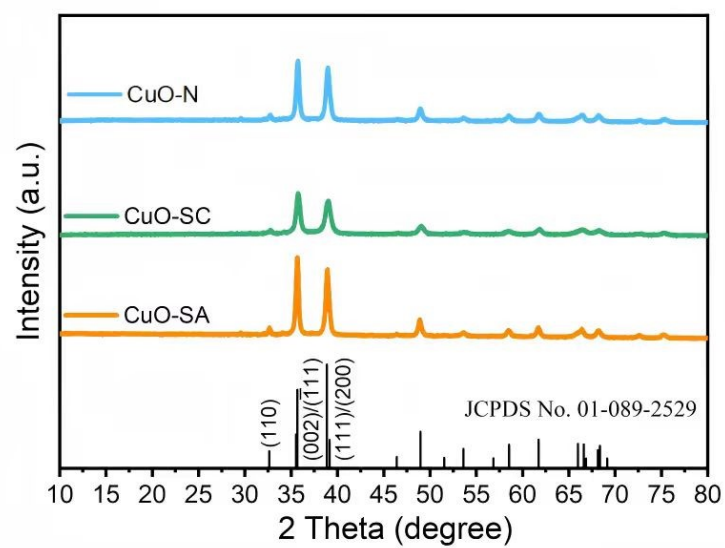

Figure S2. XRD patterns of CuO-N, CuO-SC, and CuO-SA catalysts.

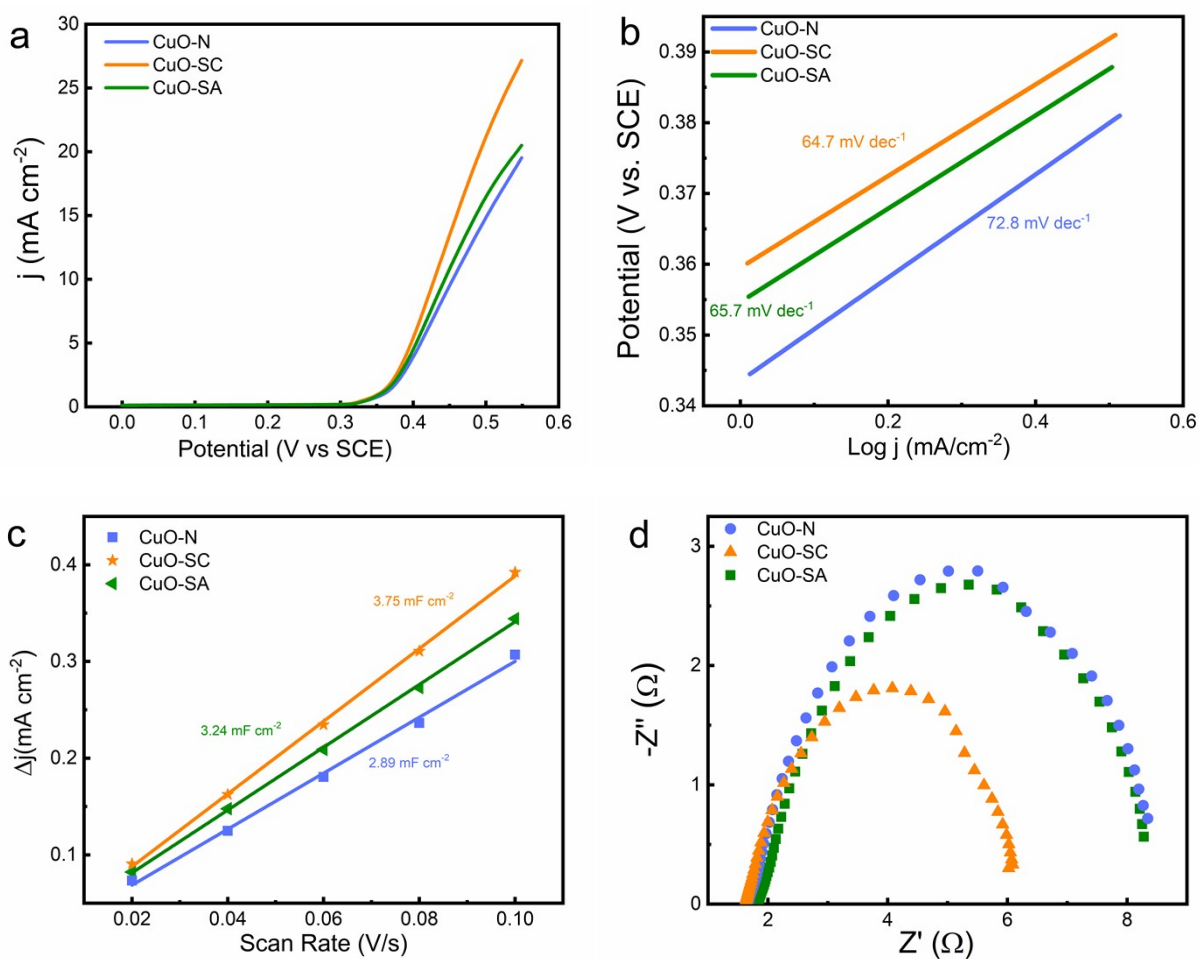

Figure S3. Comparative electrocatalytic performance of CuO catalysts with different exposed facets. (a) LSV curves. (b) Corresponding Tafel slopes. (c)  $C_{dl}$  derived from CV scans in the non-Faradaic region. (d) EIS Nyquist plots.

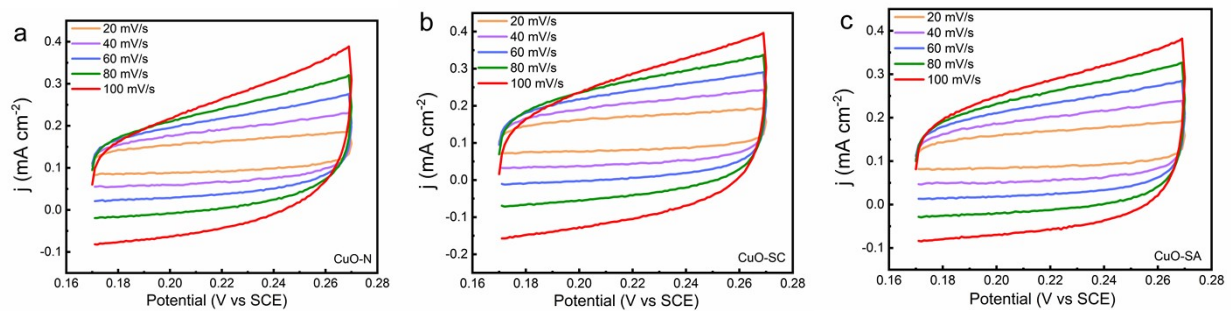

Figure S4. CV curves recorded in the non-Faradaic potential region at various scan rates (20 - 100 mV s<sup>-1</sup>) for (a) CuO-N, (b) CuO-SC, and (c) CuO-SA

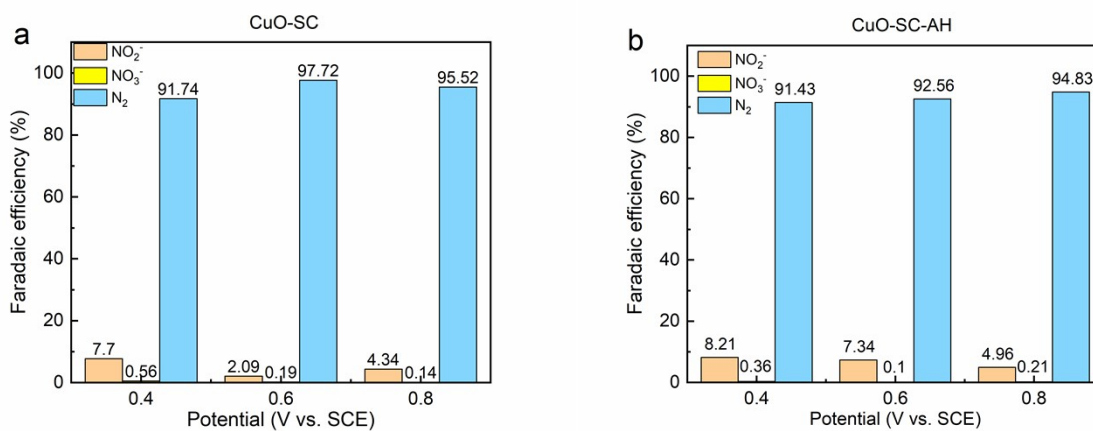

Figure S5. Potential-dependent Faradaic efficiencies (FEs) of AOR products over different catalysts. (a) CuO-SC, and (b) CuO-SC-AH.

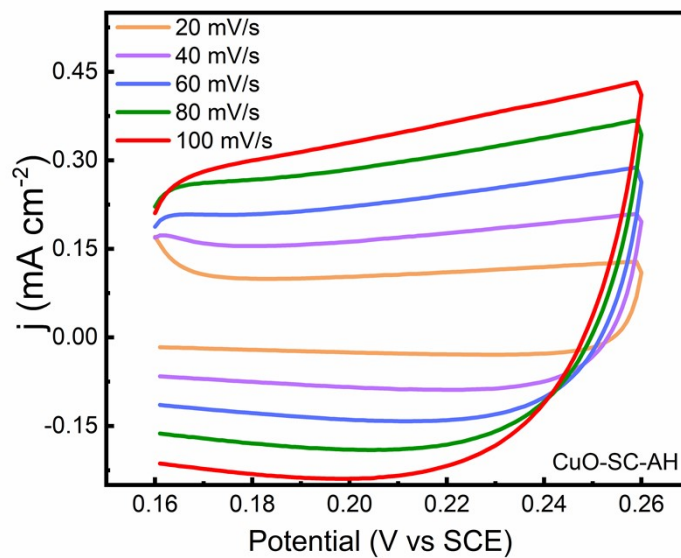

Figure S6. CV curves for CuO-SC-AH recorded in the non-Faradaic potential region at various scan rates (20 - 100 mV s<sup>-1</sup>).

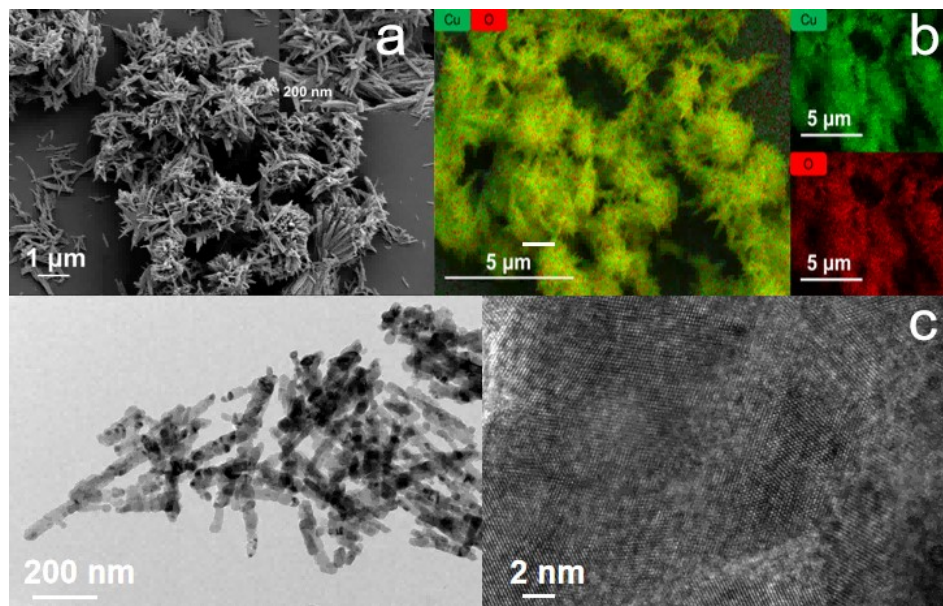

Figure S7. Microstructural and elemental characterization of CuO-SC-AH catalyst. (a) SEM image, (b) Corresponding EDS elemental mapping for Cu and O, and (c) TEM image.

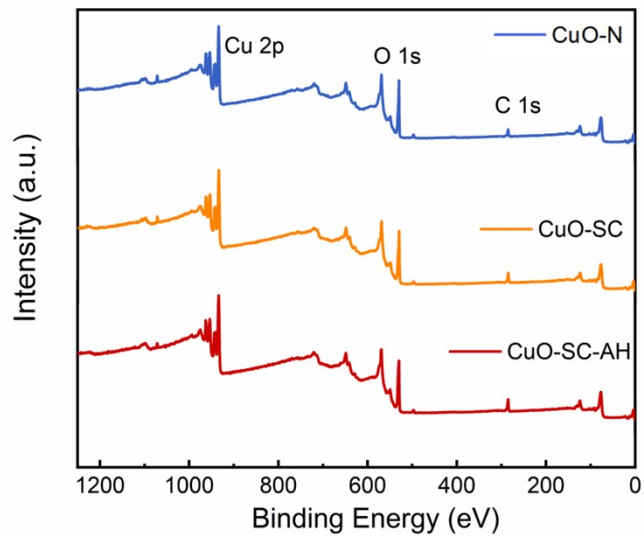

Figure S8. The XPS survey spectra of CuO, CuO-SC and CuO-SC-AH.

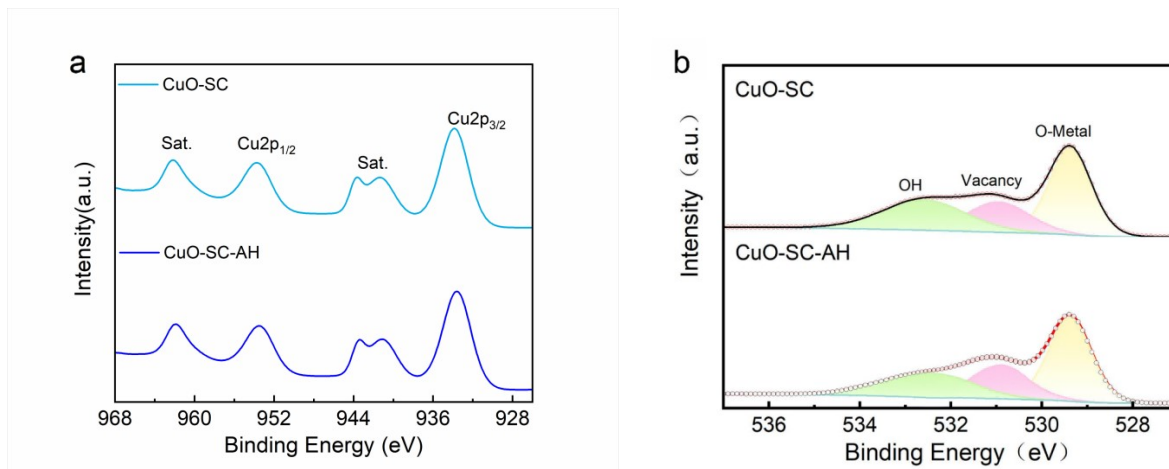

Figure S9. High-resolution XPS spectra of CuO-SC and CuO-SC-AH after the AOR test. (a) Cu 2p, (b) O 1s.

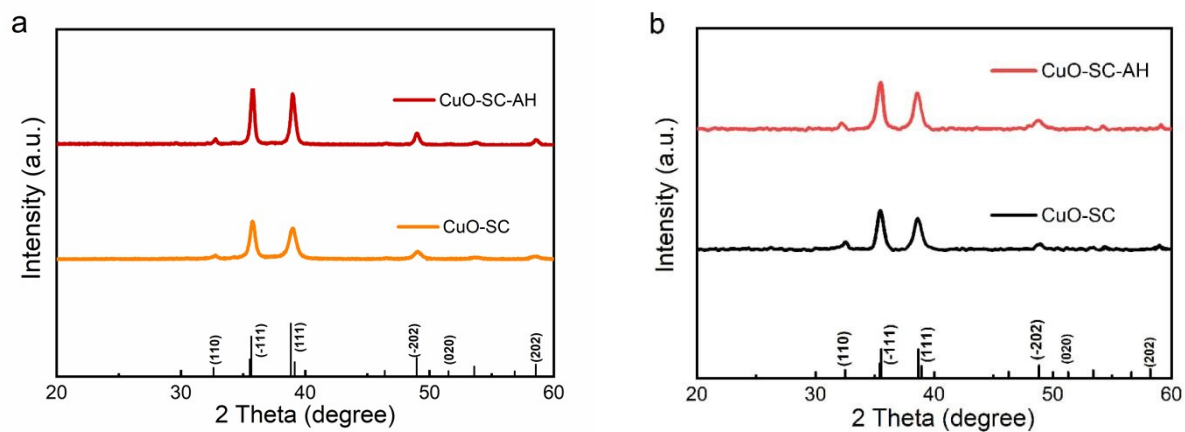

Figure S10. XRD patterns of CuO-SC and CuO-SC-AH before (a) and after (b) the AOR test.

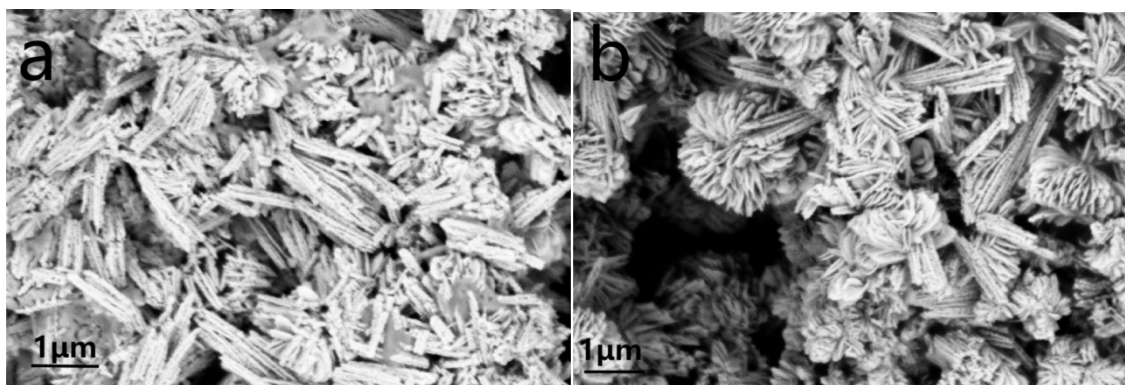

Figure S11. SEM images of CuO-SC and CuO-SC-AH after the AOR test: (a) CuO-SC, (b) CuO-SC-AH.

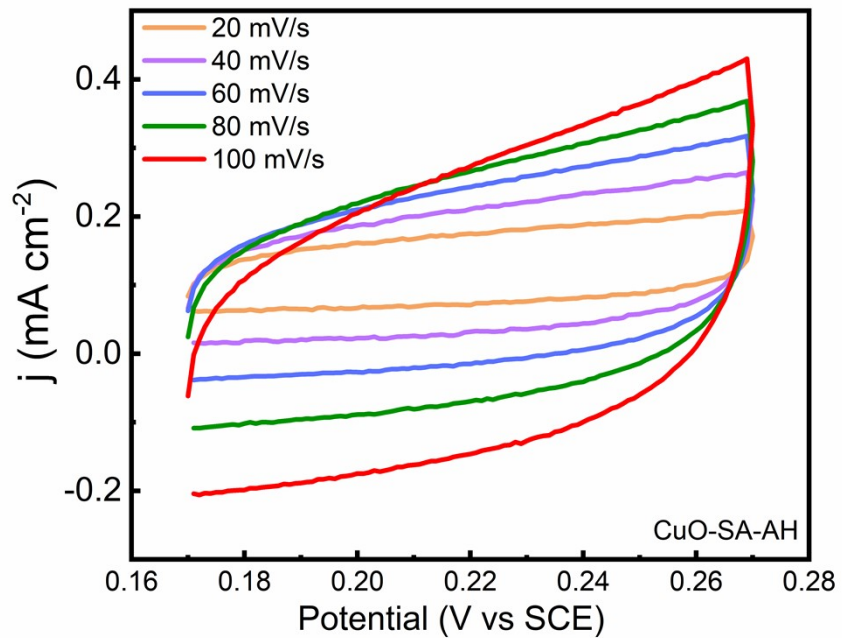

Figure S12. CV curves for CuO-SA-AH recorded in the non-Faradaic potential region at various scan rates (20 - 100 mV s<sup>-1</sup>).

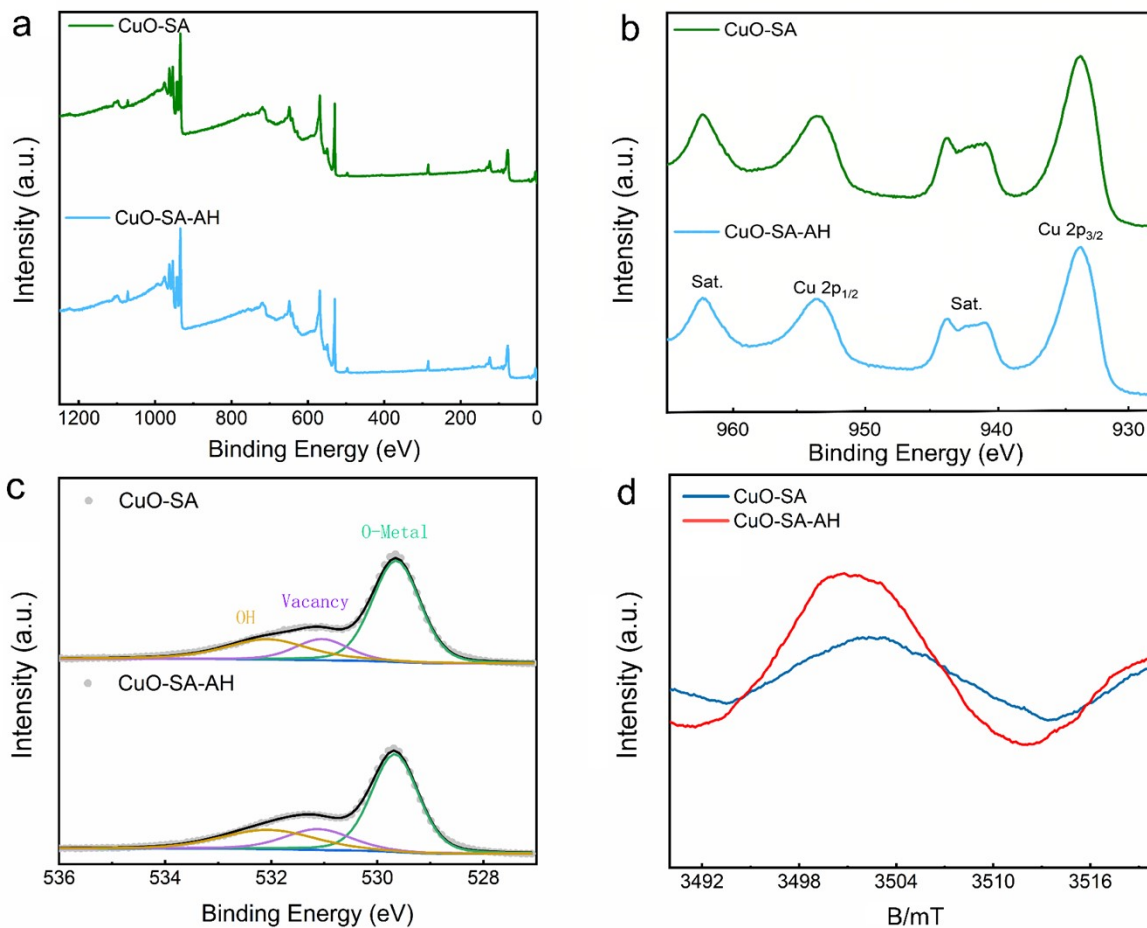

Figure S13. Comparative XPS and EPR analysis of CuO-SA and CuO-SA-AH. (a) Survey scans, (b) Cu 2p, (c) O 1s spectra, and (d) EPR spectra.

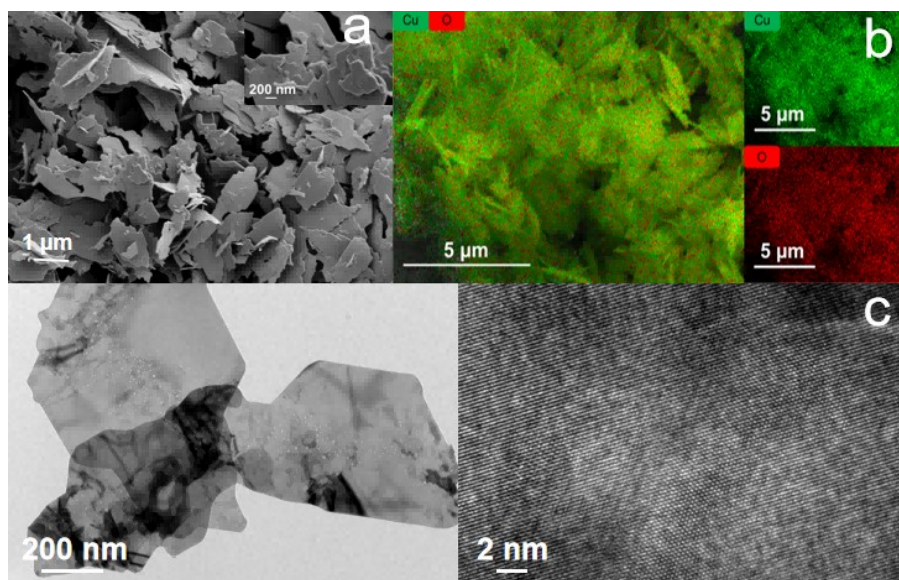

Figure S14. Microstructural and elemental characterization of CuO-SA-AH catalyst. (a) SEM image, (b) Corresponding EDS elemental mapping for Cu and O, and (c) TEM image.

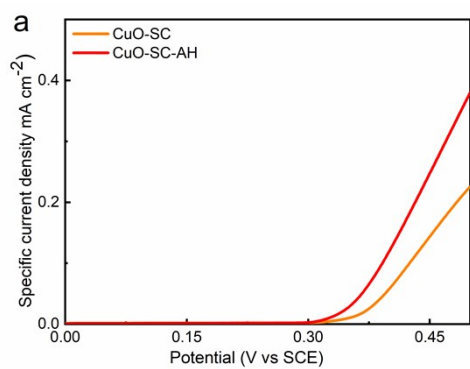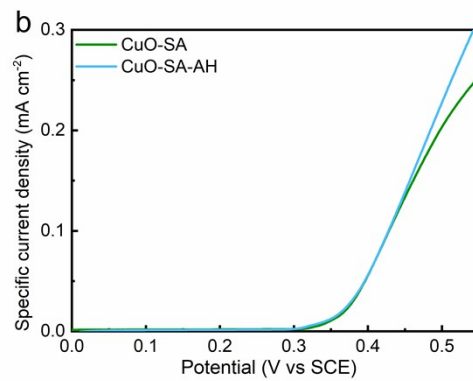

Figure S15. The ECSA-normalized polarization curves of (a) CuO-SC and CuO-SC-AH, (b) CuO-SA and CuO-SA-AH.

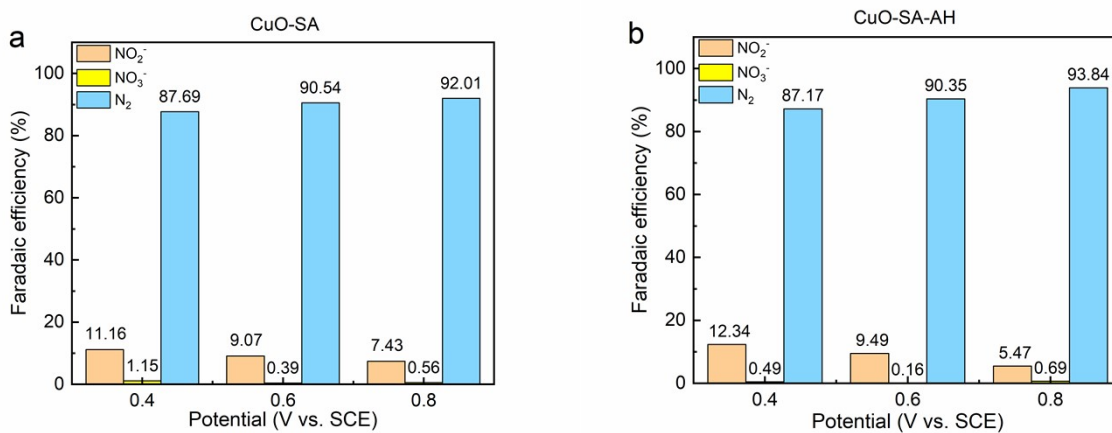

Figure S16. Potential-dependent Faradaic efficiencies (FEs) of AOR products over different catalysts. (a) CuO-SA, (b) CuO-SA-AH.
